# Supplementary material
Source: Copernicus journal article supplement (doi:10.5194/hess-30-2315-2026)
Supplement: Supplementary file 1 [file hess-30-2315-2026-supplement.pdf]

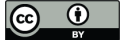

*Supplement of*

## **Joint characterization of heterogeneous conductivity fields and pumping well attributes through iterative ensemble smoother with a reduced-order modeling strategy for solute transport**

**Chuan-An Xia et al.**

*Correspondence to:* Jiayun Li ([lijy@fpnu.edu.cn](mailto:lijy@fpnu.edu.cn)) and Monica Riva ([monica.riva@polimi.it](mailto:monica.riva@polimi.it))

The copyright of individual parts of the supplement might differ from the article licence.

23

24 Table S1 Values of Kullback-Leibler Divergence (KLD) between the sample  
25 probability density functions of heads at the three reference points (i.e., I, II, and III)  
26 at the final outer iteration through iES\_FSM ( $h_{\text{FSM}}$ ) and iES\_ROM ( $h_{\text{ROM}}$ ) with  $n = 5$   
27 (TC1), 10 (TC2), 20 (TC4), and 30 (TC6).

| $\text{KLD}(h_{\text{ROM}}  h_{\text{FSM}}), \text{KLD}(h_{\text{FSM}}  h_{\text{ROM}})$ | I          | II         | III        |
|------------------------------------------------------------------------------------------|------------|------------|------------|
| TC1                                                                                      | 2.63, 1.70 | 3.40, 1.90 | 2.25, 1.66 |
| TC2                                                                                      | 2.01, 1.08 | 2.15, 1.10 | 1.21, 1.04 |
| TC4                                                                                      | 1.48, 1.35 | 1.56, 1.31 | 1.07, 1.01 |
| TC6                                                                                      | 1.27, 1.49 | 1.23, 1.34 | 0.79, 1.02 |

28

29 Table S2 Values of Kullback-Leibler Divergence (KLD) between the sample  
 30 probability density functions of solute concentrations at the three reference points (i.e.,  
 31 I, II, and III) at the final outer iteration through iES\_FSM ( $c_{FSM}$ ) and iES\_ROM ( $c_{ROM}$ )  
 32 with  $n = 5$  (TC1), 10 (TC2), 20 (TC4), and 30 (TC6).

| KLD( $c_{ROM}  c_{FSM}$ ), KLD( $c_{FSM}  c_{ROM}$ ) | I          | II         | III        |
|------------------------------------------------------|------------|------------|------------|
| TC1                                                  | 0.32, 0.82 | 1.86, 1.92 | 1.25, 1.25 |
| TC2                                                  | 0.41, 0.34 | 1.42, 1.17 | 0.37, 0.71 |
| TC4                                                  | 0.28, 0.33 | 0.85, 1.14 | 0.24, 0.59 |
| TC6                                                  | 0.30, 0.32 | 0.93, 1.11 | 0.11, 0.43 |

34 Table S3 Values of Kullback-Leibler Divergence (KLD) between the sample  
 35 probability density functions of  $x_{1,q_s}$  ( $x_{2,q_s}$ , or  $\ln q_s$ ) obtained through iES\_FSM  
 36 ( $p_{j\text{FSM}}, j = x_{1,q_s}, x_{2,q_s}, \text{ and } \ln q_s$ ) and iES\_ROM ( $p_{j\text{ROM}}$ ) with  $n = 30$ , considering  $N_m$   
 37 = 9, 18, and 55 (corresponding to TCs 18, 19, and 6, respectively).

| $\text{KLD}(p_{j\text{ROM}}  p_{j\text{FSM}}), \text{KLD}(p_{j\text{FSM}}  p_{j\text{ROM}})$ | $j = x_{1,q_s}$ | $j = x_{2,q_s}$ | $j = \ln q_s$ |
|----------------------------------------------------------------------------------------------|-----------------|-----------------|---------------|
| TC18                                                                                         | 4.54, 5.51      | 4.68, 5.36      | 7.30, 7.80    |
| TC19                                                                                         | 2.02, 1.86      | 3.18, 3.67      | 7.21, 7.04    |
| TC6                                                                                          | 1.43, 0.78      | 3.49, 3.34      | 5.98, 6.70    |

38

39
